# Supplementary material for: The impacts of biofuel crops on local biodiversity: a global synthesis
Source: Springer Nature journal article supplement (doi:10.1007/s10531-021-02232-5), 2021-07-24
Supplement: MOESM1 [file 19389496]

**The impacts of biofuel crops on local biodiversity: a global synthesis**

Biodiversity and Conservation

Sophie Jane Tudge, Andy Purvis and Adriana De Palma

Adriana De Palma (corresponding author). Natural History Museum, Department of Life Sciences, London, United Kingdom. a.de-palma@nhm.ac.uk. <https://orcid.org/0000-0002-5345-4917>.

Supplementary Material: Appendix 1

Land-use intensity descriptions by predominant habitat from Hudson et al. (2014).

| Predominant Land Use                   | Minimal use                                                                                                                                                                                                                      | Light use                                                                                                                                                                                                                                                         | Intense use                                                                                                                                                                                                                                                             |
|----------------------------------------|----------------------------------------------------------------------------------------------------------------------------------------------------------------------------------------------------------------------------------|-------------------------------------------------------------------------------------------------------------------------------------------------------------------------------------------------------------------------------------------------------------------|-------------------------------------------------------------------------------------------------------------------------------------------------------------------------------------------------------------------------------------------------------------------------|
| Primary Forest and Non-Forest          | Any disturbances identified are very minor (e.g., a trail or path) or very limited in the scope of their effect (e.g., hunting of a particular species of limited ecological importance).                                        | One or more disturbances of moderate intensity (e.g., selective logging) or breadth of impact (e.g., bushmeat extraction), which are not severe enough to markedly change the nature of the ecosystem. Primary sites in suburban settings are at least Light use. | One or more disturbances that is severe enough to markedly change the nature of the ecosystem; this includes clear-felling of part of the site too recently for much recovery to have occurred. Primary sites in fully urban settings should be classed as Intense use. |
| Mature Secondary Vegetation (all ages) | As for Primary Vegetation-Minimal use.                                                                                                                                                                                           | As for Primary Vegetation-Light use.                                                                                                                                                                                                                              | As for Primary Vegetation-Intense use.                                                                                                                                                                                                                                  |
| Plantation Forest                      | Extensively managed or mixed timber, fruit/coffee, oil-palm or rubber plantations in which native understorey and/or other native tree species are tolerated, which are not treated with pesticide or fertiliser, and which have | Monoculture fruit/coffee/rubber plantations with limited pesticide input, or mixed species plantations with significant inputs. Monoculture timber plantations of mixed age with no recent (< 20 years) clear-felling. Monoculture                                | Monoculture fruit/coffee/rubber plantations with significant pesticide input. Monoculture timber plantations with similarly aged trees or timber/oil-palm.                                                                                                              |

|          |                                                                                                                                                                                                                               |                                                                                                                                                                                                                                                                                                                                                                             |                                                                                                                                                                                                                             |
|----------|-------------------------------------------------------------------------------------------------------------------------------------------------------------------------------------------------------------------------------|-----------------------------------------------------------------------------------------------------------------------------------------------------------------------------------------------------------------------------------------------------------------------------------------------------------------------------------------------------------------------------|-----------------------------------------------------------------------------------------------------------------------------------------------------------------------------------------------------------------------------|
|          | not been recently (< 20 years) clear-felled.                                                                                                                                                                                  | oil-palm plantations with no recent (< 20 years) clear-felling.                                                                                                                                                                                                                                                                                                             | plantations with extensive recent (< 20 years) clear-felling.                                                                                                                                                               |
| Cropland | Low-intensity farms, typically with small fields, mixed crops, crop rotation, little or no inorganic fertiliser use, little or no pesticide use, little or no ploughing, little or no irrigation, little or no mechanisation. | Medium intensity farming, typically showing some but not many of the following: large fields, annual ploughing, inorganic fertiliser application, pesticide application, irrigation, no crop rotation, mechanisation, monoculture crop.<br><br>Organic farms in developed countries often fall within this category, as may high-intensity farming in developing countries. | High-intensity monoculture farming, typically showing many of the following features: large fields, annual ploughing, inorganic fertiliser application, pesticide application, irrigation, mechanisation, no crop rotation. |
| Pasture  | Pasture with minimal input of fertiliser and pesticide, and with low stock density (not high enough to cause significant disturbance or to stop regeneration of vegetation).                                                  | Pasture either with significant input of fertiliser or pesticide, or with high stock density (high enough to cause significant disturbance or to stop regeneration of vegetation).                                                                                                                                                                                          | Pasture with significant input of fertiliser or pesticide, <i>and</i> with high stock density (high enough to cause significant disturbance or to stop regeneration of vegetation).                                         |

---

|       |                                           |                                                                                |                                               |
|-------|-------------------------------------------|--------------------------------------------------------------------------------|-----------------------------------------------|
| Urban | Extensive managed green spaces; villages. | Suburban (e.g. gardens), or small managed or unmanaged green spaces in cities. | Fully urban with no significant green spaces. |
|-------|-------------------------------------------|--------------------------------------------------------------------------------|-----------------------------------------------|

---

## References

Hudson LN, Newbold T, Contu S et al (2014) The PREDICTS database: a global database of how local terrestrial biodiversity responds to human impacts. *Ecol Evol* 4:4701-4735

Supplementary Material: Appendix 2

Results from our literature review, detailing the biofuel assessment of crops within the PREDICTS database as of March 2018.

| Crop name as it appears in the database                                          | Is there evidence for biofuel potential? | Description of use for biofuel                                                                        | Biofuel generation | Biofuel category | Can use waste as a biofuel? | Reference                                                                 |
|----------------------------------------------------------------------------------|------------------------------------------|-------------------------------------------------------------------------------------------------------|--------------------|------------------|-----------------------------|---------------------------------------------------------------------------|
| <i>Elaeis guineensis</i>                                                         | Yes                                      | African oil palm; can use oil from fruit and kernel or waste fronds, shells and trunk                 | First              | Oil palm         | Yes                         | Danielsen et al. (2009)<br>Sukiran et al. (2017)                          |
| <i>Ananas comosus</i>                                                            | Yes                                      | Pineapple peel                                                                                        | Second             | Fruit/vegetable  | Yes                         | Saladini et al. (2016)                                                    |
| <i>Hevea brasiliensis</i>                                                        | Yes                                      | Rubber seed oil                                                                                       | Second             | Rubber           | No                          | Ikwuagwu et al. (2000)                                                    |
| <i>Annona x atemoya</i>                                                          | No                                       |                                                                                                       |                    |                  |                             |                                                                           |
| <i>Dimocarpus longan</i>                                                         | Yes                                      | Longan fruit tree wood can be processed to make bioethanol                                            | Second             | Fruit/vegetable  | Yes                         | Unpaprom et al. (2019)                                                    |
| <i>Macadamia integrifolia</i>                                                    | Yes                                      | Macadamia seed oil                                                                                    | First              | Other oil crop   | No                          | Rahman et al. (2016)                                                      |
| <i>Triticum</i> , Wheat,<br><i>Triticum aestivum</i> ,<br><i>Triticum spelta</i> | Yes                                      | Can use wheat grain or wheat straw, chaff, hull, husk, glumes and stems. Common wheat or spelt wheat. | First              | Wheat            | Yes                         | Tishler et al. (2015)<br>Barman et al. (2012)<br>Jansone and Gaile (2013) |

|                                          |     |                                                                          |        |                 |     |                                                    |
|------------------------------------------|-----|--------------------------------------------------------------------------|--------|-----------------|-----|----------------------------------------------------|
|                                          |     |                                                                          |        |                 |     | Godin et al. (2013)                                |
| <i>Brassica napus</i> , Oil<br>seed rape | Yes | Rapeseed oil                                                             | First  | Rapeseed oil    | No  | Malça et al. (2014)                                |
| <i>Avena sativa</i>                      | Yes | Oat grain and residue from processing- oat<br>waste/oat straw            | First  | Other grain     | Yes | Ahlgren et al. (2011)                              |
| <i>Solanum tuberosum</i>                 | Yes | Potato peel waste, potato pulp                                           | Second | Fruit/vegetable | Yes | Liang and McDonald<br>(2014)<br>Gao et al. (2012)  |
| <i>Hordeum vulgare</i> ,<br>Barley       | Yes | Winter barley and barley straw                                           | First  | Other grain     | Yes | Ahlgren et al. (2011)<br>Nghiem et al. (2017)      |
| <i>Sinapis alba</i>                      | Yes | Inedible seed oil from white mustard                                     | Second | Other oil crop  | No  | Sáez-Bastante et al.<br>(2016)                     |
| <i>Linum usitatissimum</i>               | Yes | Common flax/linseed oil, seed and oil (edible)                           | First  | Other oil crop  | No  | Borugadda and Goud<br>(2012)                       |
| <i>Cucurbita pepo</i>                    | Yes | Pumpkin seed oil                                                         | First  | Other oil crop  | No  | Schinas et al. (2009)                              |
| <i>Vicia faba</i>                        | Yes | Can use broad bean biomass residue eg. straw,<br>can also use whole crop | First  | Fruit/vegetable | Yes | Pakarinen et al. (2011)<br>Petersson et al. (2007) |

|                                                                                 |     |                                                                                                                                                    |        |                 |     |                                                                                  |
|---------------------------------------------------------------------------------|-----|----------------------------------------------------------------------------------------------------------------------------------------------------|--------|-----------------|-----|----------------------------------------------------------------------------------|
| <i>Coffea arabica</i> ,<br><i>Coffea</i> , Coffee                               | Yes | Spent coffee grounds                                                                                                                               | Second | Coffee          | Yes | Gómez-de la Cruz et al. (2015)                                                   |
| <i>Secale cereale</i>                                                           | Yes | Can grow as winter crop after harvest of main summer crop, can also use rye straw                                                                  | First  | Other grain     | Yes | Smuga-Kogut et al. (2017)<br>Shao et al. (2015)                                  |
| Grapes                                                                          | Yes | Grape skins or seeds                                                                                                                               | Second | Fruit/vegetable | Yes | Xu et al. (2009)                                                                 |
| <i>Olea europaea</i>                                                            | Yes | Olive stone residue, olive pomace, olive oil extraction waste, tree pruning biomass, leaves                                                        | Second | Fruit/vegetable | Yes | Mata-Sánchez et al. (2014)<br>Dermeche et al. (2013)<br>Manzanares et al. (2017) |
| <i>Theobroma cacao</i>                                                          | Yes | Cocoa pod husk (residue after extracting pulp), cocoa pulp juice (sweatings) or cocoa pods (residue)                                               | Second | Fruit/vegetable | Yes | Balladares et al. (2016)                                                         |
| <i>Medicago sativa</i> ,<br>Alfalfa                                             | Yes | Can use alfalfa stems for biofuel while leaves can still be used as feed for livestock                                                             | Second | Perennial grass | Yes | Gonzalez-Garcia et al. (2010)                                                    |
| <i>Zea mays</i> ,<br><i>Zea mays</i> ,<br><i>Zea Mays</i> , Corn,<br>Maize crop | Yes | Maize straw, maize silage (produced from whole plants), sugar, stover (non-grain parts; stalks, leaves and cobs remaining after harvest) and grain | First  | Maize           | Yes | Zbytek et al. (2016)<br>White et al. (2012)<br>Blanco-Canqui and Lal (2007)      |

|                             |     |                                                              |        |                 |     |                                                    |
|-----------------------------|-----|--------------------------------------------------------------|--------|-----------------|-----|----------------------------------------------------|
| <i>Brassica oleracea</i>    | No  |                                                              |        |                 |     |                                                    |
| <i>Phaseolus vulgaris</i>   | No  |                                                              |        |                 |     |                                                    |
| <i>Glycine max</i>          | Yes | Soybean oil                                                  | First  | Soybean         | No  | Cerri et al. (2017)                                |
| <i>Gossypium</i>            | Yes | Cotton stalk/post-harvest residue, waste cotton fabric       | Second | Cotton          | Yes | Christopher et al. (2017)<br>Nikolić et al. (2017) |
| <i>Manihot esculenta</i>    | Yes | Cassava and cassava waste                                    | First  | Fruit/vegetable | Yes | Hanif et al. (2017)<br>Veiga et al. (2016)         |
| <i>Colocasia esculenta</i>  | Yes | Taro and taro waste, potential in Southeast Asia             | First  | Fruit/vegetable | Yes | Ben-Iwo et al. (2016)                              |
| <i>Musa x paradisiaca</i>   | Yes | Common banana; banana lignocellulosic residue, banana peel   | Second | Fruit/vegetable | Yes | Guerrero et al. (2018)<br>Oberoi et al. (2011)     |
| <i>Solanum melongena</i>    | No  |                                                              |        |                 |     |                                                    |
| <i>Solanum lycopersicum</i> | Yes | Tomato pomace (waste skin and seeds), seed oil for biodiesel | Second | Fruit/vegetable | Yes | Allison et al. (2016)                              |
| <i>Arachis hypogaea</i>     | Yes | Peanut; waste shells, seed oil                               | First  | Other oil crop  | Yes | Polachini et al. (2016)<br>Russo and Webber (2012) |
| <i>Cucumis sativus</i>      | Yes | Cucumber pomace containing pulp, peel, seeds, and stem       | Second | Fruit/vegetable | Yes | Szymanska-Chargot et al. (2017)                    |



|                           |     |                                                                        |        |                 |     |                                                                                 |
|---------------------------|-----|------------------------------------------------------------------------|--------|-----------------|-----|---------------------------------------------------------------------------------|
| <i>Daucus carota</i>      | Yes | Wild carrot pomace, carrots which are discarded due to sizing problems | Second | Fruit/vegetable | Yes | Szymanska-Chargot et al. (2017)<br>Aimaretti et al. (2012)                      |
| <i>Apium graveolens</i>   | No  |                                                                        |        |                 |     |                                                                                 |
| <i>Ribes nigrum</i>       | Yes | Blackcurrant pomace obtained after pressing-seeds, peels and pulp      | Second | Fruit/vegetable | Yes | Déniel et al. (2016)                                                            |
| <i>Euterpe edulis</i>     | No  |                                                                        |        |                 |     |                                                                                 |
| <i>Cocos nucifera</i>     | Yes | Coconut oil, shell, husk                                               | First  | Other oil crop  | Yes | Tupufia et al. (2013)<br>Mendu et al. (2012)                                    |
| <i>Psidium guajava</i>    | No  |                                                                        |        |                 |     |                                                                                 |
| <i>Mangifera indica</i>   | Yes | Mango seed oil, pulp and peel, leaf litter or stem bark residue        | First  | Fruit/vegetable | Yes | Akhtar et al. (2016)<br>Carrillo-Nieves et al. (2017)<br>Fernando et al. (2014) |
| <i>Averrhoa carambola</i> | No  |                                                                        |        |                 |     |                                                                                 |
| <i>Citrus limon</i>       | Yes | Lemon peel waste                                                       | Second | Fruit/vegetable | Yes | Boluda-Aguilar and López-Gómez (2013)                                           |

|                               |     |                                                                                                                 |        |                 |     |                                                                                 |
|-------------------------------|-----|-----------------------------------------------------------------------------------------------------------------|--------|-----------------|-----|---------------------------------------------------------------------------------|
| <i>Bambuseae</i>              | Yes | Bamboo lignocellulosic substrate can be used due to its high growth efficiency                                  | Second | Perennial grass | Yes | He et al. (2014)                                                                |
| <i>Citrus x sinensis</i>      | Yes | Orange peel                                                                                                     | Second | Fruit/vegetable | Yes | Negro et al. (2017)                                                             |
| <i>Oryza sativa</i>           | Yes | Rice straw and husk                                                                                             | Second | Other grain     | Yes | Banerjee et al. (2009)<br>Victor et al. (2016)                                  |
| <i>Ipomoea batatas</i>        | Yes | Starch from sweet potato tubers, residues from after separating starch, peel                                    | First  | Fruit/vegetable | Yes | Waluyo et al. 2015)<br>Wang et al. (2016)                                       |
| <i>Ilex paraguariensis</i>    | No  |                                                                                                                 |        |                 |     |                                                                                 |
| <i>Avena barbata</i>          | No  |                                                                                                                 |        |                 |     |                                                                                 |
| <i>Trifolium subterraneum</i> | No  |                                                                                                                 |        |                 |     |                                                                                 |
| <i>Helianthus annuus</i>      | Yes | Common sunflower seed oil is commonly used in Europe, could also be used as a source of lignocellulosic biomass | First  | Other oil crop  | Yes | Marvey (2008)<br>Ziebell et al. (2013)                                          |
| <i>Carica papaya</i>          | Yes | Papaya peel, waste seed oil, waste fruit puree                                                                  | Second | Fruit/vegetable | Yes | Dahunsi et al. (2017)<br>Winayanuwattikun et al. (2008)<br>Heller et al. (2015) |
| <i>Artocarpus altilis</i>     | Yes | Breadfruit starch                                                                                               | First  | Fruit/vegetable | No  | Betiku and Taiwo (2015)                                                         |

|                                 |     |                                                                                                                                              |        |                 |     |                                                      |
|---------------------------------|-----|----------------------------------------------------------------------------------------------------------------------------------------------|--------|-----------------|-----|------------------------------------------------------|
| <i>Artocarpus heterophyllus</i> | Yes | Jackfruit woody biomass or stone (stone is edible but most ends up as waste)                                                                 | Second | Fruit/vegetable | Yes | Dutta et al. (2014)<br>Nuriana and Wuryantoro (2015) |
| <i>Sorghum bicolor</i>          | Yes | Sweet sorghum stalks                                                                                                                         | First  | Other grain     | Yes | Chen et al. (2016)<br>Mathur et al. (2017)           |
| <i>Eleusine coracana</i>        | No  |                                                                                                                                              |        |                 |     |                                                      |
| <i>Panicum miliaceum</i>        | Yes | Proso millet grain (used mainly as bird/livestock feed but can be eaten by humans). Close relative to switchgrass (well-known biofuel crop). | First  | Other grain     | No  | Rose and Santra (2013)                               |
| <i>Pennisetum glaucum</i>       | Yes | Ground pearl millet (grown mostly for livestock but can be eaten by humans), agricultural waste/hay                                          | First  | Other grain     | Yes | Chen et al. (2007)<br>Wu et al. (2006)               |
| <i>Setaria italica</i>          | Yes | Foxtail millet (grown as human and animal food)                                                                                              | First  | Other grain     | No  | Zhang et al. (2012)                                  |
| Teak                            | Yes | Teak wood pellets                                                                                                                            | Second | Woody crop      | No  | Tenorio et al. (2015)                                |
| <i>Musa textilis</i>            | No  |                                                                                                                                              |        |                 |     |                                                      |
| <i>Sechium edule</i>            | No  |                                                                                                                                              |        |                 |     |                                                      |

|                          |     |                                                                                                                  |        |                 |     |                                                                          |
|--------------------------|-----|------------------------------------------------------------------------------------------------------------------|--------|-----------------|-----|--------------------------------------------------------------------------|
| <i>Sorghum</i>           | No  |                                                                                                                  |        |                 |     |                                                                          |
| <i>arundinaceum</i>      |     |                                                                                                                  |        |                 |     |                                                                          |
| <i>Areca catechu</i>     | Yes | Areca nut husk                                                                                                   | Second | Woody crop      | Yes | Sasmal et al. (2012)                                                     |
| <i>Anacardium</i>        | Yes | Cashew nut oil, nut shell liquid (by-product                                                                     | First  | Other oil crop  | Yes | Eddy et al. (2011)                                                       |
| <i>occidentale</i>       |     | from nut production), cashew apple juice<br>(apple usually a neglected product), cashew<br>apple bagasse (straw) |        |                 |     | Sanjeeva et al. (2014)<br>Deenanath et al. (2015)<br>Rocha et al. (2014) |
| <i>Inga edulis</i>       | No  |                                                                                                                  |        |                 |     |                                                                          |
| <i>Persea americana</i>  | Yes | Avocado flesh or seeds                                                                                           | First  | Fruit/vegetable | Yes | Adekunle et al. (2016)<br>Aysu and Durak (2015)                          |
| <i>Camellia sinensis</i> | Yes | Spent kitchen waste tea can be used for<br>biodiesel, or tea seed oil                                            | Second | Tea             | Yes | Demirbas (2010)<br>Mahmood and Hussain<br>(2010)                         |
| <i>Ricinus communis</i>  | Yes | Castor bean seed oil, castor plant<br>lignocellulosic biomass- leaves and stems                                  | Second | Other oil crop  | Yes | Timko et al. (2014)<br>Mathur and Chakraborty<br>(2016)                  |
| <i>Jatropha curcas</i>   | Yes | Seed oil widely used as biofuel. Could also use<br>husk/shell                                                    | Second | Other oil crop  | Yes | Abhilash et al. (2011)<br>Makkar and Becker<br>(2009)                    |

|                                  |     |                                                                                                                                                                                               |        |                 |     |                                                                       |
|----------------------------------|-----|-----------------------------------------------------------------------------------------------------------------------------------------------------------------------------------------------|--------|-----------------|-----|-----------------------------------------------------------------------|
| <i>Fragaria x ananassa</i>       | No  |                                                                                                                                                                                               |        |                 |     |                                                                       |
| <i>Prunus persica</i>            | Yes | Peach tree wood, bark, branches. Pruning from cultivation; discarded peaches, peels and pulp residues from processing; unsold nectar from distribution; not consumed nectar from consumption. | Second | Fruit/vegetable | Yes | Cichy et al. (2017)<br>De Menna et al. (2015)<br>Ucuncu et al. (2013) |
| <i>Molinia caerulea</i>          | No  |                                                                                                                                                                                               |        |                 |     |                                                                       |
| <i>Juncus acutiiflorus</i>       | No  |                                                                                                                                                                                               |        |                 |     |                                                                       |
| <i>Agrostis canina</i>           | No  |                                                                                                                                                                                               |        |                 |     |                                                                       |
| <i>Lolium perenne</i>            | Yes | Common ryegrass                                                                                                                                                                               | Second | Perennial grass |     | Farrar et al. (2012)                                                  |
| <i>Trifolium repens</i>          | No  |                                                                                                                                                                                               |        |                 |     |                                                                       |
| <i>Protea compacta</i>           | No  |                                                                                                                                                                                               |        |                 |     |                                                                       |
| <i>Protea cordata</i>            | No  |                                                                                                                                                                                               |        |                 |     |                                                                       |
| <i>Leucadendron platyspermum</i> | No  |                                                                                                                                                                                               |        |                 |     |                                                                       |
| <i>Pisum sativum</i>             | Yes | Pea vine waste                                                                                                                                                                                | Second | Fruit/vegetable | Yes | Xia et al. (2016)                                                     |
| <i>Allium cepa</i>               | Yes | Waste onions, juice residue, peel/skin                                                                                                                                                        | Second | Fruit/vegetable | Yes | Vazirzadeh et al. (2012)<br>Kim et al. (2017)                         |

|                                       |     |                                                     |        |                 |     |                                                    |
|---------------------------------------|-----|-----------------------------------------------------|--------|-----------------|-----|----------------------------------------------------|
| <i>Malus domestica</i>                | Yes | Apple seeds or pomace (waste from extracting juice) | Second | Fruit/vegetable | Yes | Górnaś and Rudzińska, (2016)<br>Gama et al. (2015) |
| <i>Prunus salicina</i>                | No  |                                                     |        |                 |     |                                                    |
| <i>Chrysanthemum cinerariaefolium</i> | No  |                                                     |        |                 |     |                                                    |
| <i>Quercus suber</i>                  | No  |                                                     |        |                 |     |                                                    |
| <i>Annona squamosa</i>                | Yes | Custard apple seeds                                 | Second | Other oil crop  | Yes | Parthiban and Perumalsamy (2016)                   |
| <i>Bactris gasipaes</i>               | No  |                                                     |        |                 |     |                                                    |
| <i>Vigna unguiculata</i>              | Yes | Cowpea biomass                                      | Second | Fruit/vegetable | Yes | Foster et al. (2017)                               |
| <i>Eucalyptus camaldulensis</i>       | Yes | Woody biomass                                       | Second | Woody crop      |     | Acuna et al. (2017)                                |
| <i>Khaya senegalensis</i>             | No  |                                                     |        |                 |     |                                                    |
| <i>Dalbergia sissoo</i>               | No  |                                                     |        |                 |     |                                                    |
| <i>Cupressus sempervirens</i>         | Yes | Mediterranean cypress seed oil                      | Second | Other oil crop  | Yes | Nehdi (2013)                                       |
| <i>Khaya senegalensis</i>             | No  |                                                     |        |                 |     |                                                    |

---

|                           |    |
|---------------------------|----|
| <i>Brassica rapa</i> var. | No |
| <i>rapa</i>               |    |

---

|                   |    |
|-------------------|----|
| <i>Fagopyrum</i>  | No |
| <i>esculentum</i> |    |

---

## References

- Abhilash PC, Srivastava P, Jamil S, Singh N (2011) Revisited *Jatropha curcas* as an oil plant of multiple benefits: critical research needs and prospects for the future. *Environ Sci Poll Res* 18:127-131
- Acuna E, Cancino J, Rubilar R, Parra C (2017) Bioethanol Potential from High Density Short Rotation Woody Crops on Marginal Lands in Central Chile. *Cerne* 23:133-145
- Adekunle AS, Oyekunle JAO, Obisesan OR, Ojo OS, Ojo OS (2016) Effects of degumming on biodiesel properties of some non-conventional seedoils. *Energ Rep* 2:188-193
- Ahlgren S, Hansson P-A, Kimming M, Aronsson P, Lundkvist H (2011) Greenhouse gas emissions from cultivation of agricultural crops for biofuels and production of biogas from manure. Swedish University of Agricultural Sciences, Uppsala, Sweden. [https://pub.epsilon.slu.se/14114/1/ahlgren\\_et\\_al\\_170228.pdf](https://pub.epsilon.slu.se/14114/1/ahlgren_et_al_170228.pdf). Accessed April 2020
- Aimaretti NR, Ybalo CV, Rojas ML, Plou FJ, Yori JC (2012) Production of bioethanol from carrot discards. *Bioresour Technol* 123:727-732
- Akhtar N, Goyal D, Goyal A (2016) Physico-chemical characteristics of leaf litter biomass to delineate the chemistries involved in biofuel production. *J Taiwan Inst Chem Eng* 62:239-246
- Allison BJ, Canales Cadiz J, Karuna N, Jeoh T, Simmons CW (2016) The Effect of Ionic Liquid Pretreatment on the Bioconversion of Tomato Processing Waste to Fermentable Sugars and Biogas. *App Biochem Biotech* 179:1227-1247

- Aysu T, Durak H (2015) Assessment of avocado seeds (*Persea americana*) to produce bio-oil through supercritical liquefaction. *Biofpr* 9:231-257
- Balladares C, Choez-Guaranda I, Garcia J, Sosa D, Perez S, Gonzalez JE, Viteri R, Barragan A, Quijano-Aviles M, Manzano P (2016) Physicochemical characterization of *Theobroma cacao* L. sweatings in Ecuadorian coast. *Emir J Food Agric*. 28:741-745
- Banerjee S, Sen R, Pandey RA, Chakrabarti T, Satpute D, Giri BS, Mudliar S (2009) Evaluation of wet air oxidation as a pretreatment strategy for bioethanol production from rice husk and process optimization. *Biomass Bioenerg* 33:1680-1686
- Barman DN, Haque MA, Kang TH, Kim MK, Kim J, Kim H, Yun HD (2012) Alkali Pretreatment of Wheat Straw (*Triticum aestivum*) at Boiling Temperature for Producing a Bioethanol Precursor. *Biosci Biotech Bioch* 76:2201-2207
- Ben-Iwo J, Manovic V, Longhurst P (2016) Biomass resources and biofuels potential for the production of transportation fuels in Nigeria. *Renew Sust Energ Rev* 63:172-192
- Betiku E, Taiwo AE (2015) Modeling and optimization of bioethanol production from breadfruit starch hydrolyzate vis-à-vis response surface methodology and artificial neural network. *Renew Energ* 74:87-94
- Blanco-Canqui H, Lal R (2007) Soil and crop response to harvesting corn residues for biofuel production. *Geoderma* 141:355-362
- Boluda-Aguilar M, López-Gómez A (2013) Production of bioethanol by fermentation of lemon (*Citrus limon* L.) peel wastes pretreated with steam explosion. *Ind Crop Prod* 41:188-197
- Borugadda VB, Goud VV (2012) Biodiesel production from renewable feedstocks: Status and opportunities. *Renw Sust Energ Rev* 16:4763-4784
- Carrillo-Nieves D, Ruiz HA, Aguilar CN, Ilyina A, Parra-Saldivar R, Torres JA, Martínez Hernández JL (2017) Process alternatives for bioethanol production from mango stem bark residues. *Bioresource Technol* 239:430-436
- Chen H., Xu M, Guo Q, Yang L, Ma Y (2016) A review on present situation and development of biofuels in China. *J Energ Inst* 89:248-255



Chen Y, Sharma-Shivappa RR, Keshwani D, Chen C (2007) Potential of agricultural residues and hay for bioethanol production. *Appl Biochem Biotech* 142:276-290

Christopher M, Mathew AK, Kiran Kumar M, Pandey A, Sukumaran RK (2017) A biorefinery-based approach for the production of ethanol from enzymatically hydrolysed cotton stalks. *Bioresource Technol* 242:178-183

Cichy W, Witczak M, Walkowiak M (2017) Fuel Properties of Woody Biomass from Pruning Operations in Fruit Orchards. *Bioresources* 12:6458-6470

Dahunsi SO, Oranusi S, Efevbokhan VE (2017) Cleaner energy for cleaner production: Modeling and optimization of biogas generation from *Carica papayas* (Pawpaw) fruit peels. *J Clean Prod* 156:19-29

Danielsen F, Beukema H, Burgess ND, Parish F, Bruehl CA, Donald PF, Murdiyarso D, Phalan B, Reijnders, L, Struebig M, Fitzherbert EB (2009) Biofuel Plantations on Forested Lands: Double Jeopardy for Biodiversity and Climate. *Conserv Biol* 23:348-358

De Menna F, Vittuari M, Molari G (2015) Impact evaluation of integrated food-bioenergy systems: A comparative LCA of peach nectar. *Biomass Bioenerg* 73:48-61

Deenanath ED, Rumbold K, Daramola M, Falcon R, Iyuke S (2015) Evaluation of Physicochemical Properties of South African Cashew Apple Juice as a Biofuel Feedstock. *Scientifica* 764196

Demirbas A (2010) Tea seed upgrading facilities and economic assessment of biodiesel production from tea seed oil. *Energ Convers Manage* 51:2595-2599

Déniel M, Haarlemmer G, Roubaud A, Weiss-Hortala E, Fages J (2016) Optimisation of bio-oil production by hydrothermal liquefaction of agro-industrial residues: Blackcurrant pomace (*Ribes nigrum* L.) as an example. *Biomass Bioenerg* 95:273-285

Dermeche S, Nadour M, Larroche C, Moulti-Mati F, Michaud P (2013) Olive mill wastes: Biochemical characterizations and valorization strategies. *Process Biochem* 48:1532-1552

Dutta PP, Das A, Pandey V, Devi M (2014) Fuel Characteristics of Some Locally Available Biomass as a Potential Gasification Feedstock for Thermal Application. *Ind Eng Chem Res* 53:19806-19813

Eddy NO, Ukpong JA, Ebenso EE (2011) Lipids Characterization and Industrial Potentials of Pumpkin Seeds (*Telfairia occidentalis*) and Cashew Nuts (*Anacardium occidentale*). *E-J Chem* 8:1986-1992

Farrar K, Bryant DN, Turner L, Gallagher JA, Thomas A, Farrell M, Humphreys MO, Donnison IS (2012) Breeding for Bio-ethanol Production in *Lolium perenne* L.: Association of Allelic Variation with High Water-Soluble Carbohydrate Content. *Bioenerg Res* 5:149-157

Fernando SEL, Bianca PY, Sergio S, Eapen D, Sebastian, PJ (2014) Evaluation of agro-industrial wastes to produce bioethanol: case study - mango (*Mangifera indica* L.) *Enrgy Proced* 57:860-866

Foster JL, Muir JP, Bow JR, Valencia E (2017) Biomass and nitrogen content of fifteen annual warm-season legumes grown in a semi-arid environment. *Biomass Bioenerg* 106:38-42

Gama R, Van Dyk JS, Pletschke BI (2015) Optimisation of enzymatic hydrolysis of apple pomace for production of biofuel and biorefinery chemicals using commercial enzymes. *3 Biotech* 5:1075-1087

Gao M, Yano S, Inoue H, Sakanishi K (2012) Production of ethanol from potato pulp: Investigation of the role of the enzyme from *Acremonium cellulolyticus* in conversion of potato pulp into ethanol. *Process Biochem* 47:2110-2115

Godin B, Lamaudière S, Agneessens R, Schmit T, Goffart J, Stilmant D, Gerin PA, Delcarte J (2013) Chemical characteristics and biofuel potential of several vegetal biomasses grown under a wide range of environmental conditions. *Ind Crop Prod* 48:1-12

Gómez-de la Cruz FJ, Cruz-Peragón F, Casanova-Peláez PJ, Palomar-Carnicero JM (2015) A vital stage in the large-scale production of biofuels from spent coffee grounds: The drying kinetics. *Fuel Process Technol* 130:188-196

Gonzalez-Garcia S, Moreira MT, Feijoo G (2010) Environmental performance of lignocellulosic bioethanol production from Alfalfa stems. *Biofpr* 4:118-131

Górnaś P, Rudzińska M (2016) Seeds recovered from industry by-products of nine fruit species with a high potential utility as a source of unconventional oil for biodiesel and cosmetic and pharmaceutical sectors. *Ind Crop Prod* 83:329-338

Guerrero AB, Ballesteros I, Ballesteros M (2018) The potential of agricultural banana waste for bioethanol production. *Fuel* 213:176-185

Hanif M, Mahlia TMI, Aditiya HB, Abu Bakar MS (2017) Energy and environmental assessments of bioethanol production from Sri Kanji 1 cassava in Malaysia. *Biofuel Res J.* 4:537-544

He M, Wang J, Qin H, Shui Z, Zhu Q, Wu B, Tan F, Pan K, Hu Q, Dai L, Wang W, Tang X, Hu G Q (2014) Bamboo: A new source of carbohydrate for biorefinery. *Carbohydr Polym* 111:645-654

Heller WP, Kissinger KR, Matsumoto TK, Keith LM (2015) Utilization of papaya waste and oil production by *Chlorella protothecoides*. *Algal Res* 12:156-160

Ikwuagwu OE, Ononogbu IC, Njoku OU (2000) Production of biodiesel using rubber [*Hevea brasiliensis* (Kunth. Muell.)] seed oil. *Ind Crop Prod* 12:57-62

Jansone I, Gaile Z (2013) Production of Bioethanol from Starch Based Agriculture Raw Material. *Res Rural Dev* 1:35-42

Kim HM, Song Y, Wi SG, Bae H (2017) Production of D-tagatose and bioethanol from onion waste by an integrating bioprocess. *J Biotechnol* 260:84-90

Liang S, McDonald AG (2014) Chemical and Thermal Characterization of Potato Peel Waste and Its Fermentation Residue as Potential Resources for Biofuel and Bioproducts Production. *J Agr Food Chem* 62:8421-8429

Mahmood T, Hussain, ST (2010) Nanobiotechnology for the production of biofuels from spent tea. *Afr J Biotechnol* 9:858-868.

Makkar HRS, Becker K (2009) *Jatropha curcas*, a promising crop for the generation of biodiesel and value-added coproducts. *Eur J Lipid Sci Tech* 111:773-787

Malça J, Coelho A, Freire F (2014) Environmental life-cycle assessment of rapeseed-based biodiesel: Alternative cultivation systems and locations. *Appl Energ* 114:837-844

Manzanares P, Ruiz E, Ballesteros M, Negro MJ, Gallego FJ, Lopez-Linares JC, Castro E (2017) Residual biomass potential in olive tree cultivation and olive oil industry in Spain: valorization proposal in a biorefinery context. *Span J Agric Res* 15:e0206

Marvey BB (2008) Sunflower-based feedstocks in nonfood applications: Perspectives from olefin metathesis. *Int J Mol Sci* 9:1393-1406

Mata-Sánchez J, Pérez-Jiménez JA, Díaz-Villanueva MJ, Serrano A, Núñez-Sánchez N, López-Giménez FJ (2014) Development of olive stone quality system based on biofuel energetic parameters study. *Renew Energ* 66:251-256

Mathur D, Chakraborty S (2016) Kinetics of Microwave-based Ionic Liquid-mediated Catalytic Conversion of *Ricinus Communis* to Biofuel Products. *Chem Engineer Trans* 52:967-972

Mathur S, Umakanth AV, Tonapi VA, Sharma R, Sharma MK (2017) Sweet sorghum as biofuel feedstock: recent advances and available resources. *Biotechnol Biofuels*. 10:146.

Mendu V, Shearin T, Campbell Jr EJ, Stork J, Jae J, Crocker M, Huber G, DeBolt S (2012) Global bioenergy potential from high-lignin agricultural residue. *P Natl Acad Sci USA* 109:4014-4019

Negro V, Ruggeri B, Mancini G, Fino D (2017) Recovery of D-limonene through moderate temperature extraction and pyrolytic products from orange peels. *J Chem Technol Biot* 92:1186-1191

Nehdi IA (2013) *Cupressus sempervirens* var. *horizontalis* seed oil: Chemical composition, physicochemical characteristics, and utilizations. *Ind Crop Prod* 41:381-385

Nghiem NP, Brooks WS, Griffey CA, Toht MJ (2017) Production of Ethanol From Newly Developed and Improved Winter Barley Cultivars. *Appl Biochem Biotech* 182:400-410

Nikolić S, Lazić V, Veljović Đ, Mojović L (2017) Production of bioethanol from pre-treated cotton fabrics and waste cotton materials. *Carbohyd Polym* 164:136-144

Nuriana W, Wuryantoro (2015) Ethanol Synthesis from Jackfruit (*Artocarpus Heterophyllus* Lam.) Stone Waste as Renewable Energy Source. *Enrgy Proced* 65:372-377

Oberoi HS, Vadlani PV, Saida L, Bansal S, Hughes JD (2011) Ethanol production from banana peels using statistically optimized simultaneous saccharification and fermentation process. *Waste Manage* 31:1576-1584

Pakarinen A, Maijala P, Stoddard FL, Santanen A, Tuomainen P, Kymäläinen M, Viikari L (2011) Evaluation of annual bioenergy crops in the boreal zone for biogas and ethanol production. *Biomass Bioenerg* 35:3071-3078

Parthiban KS, Perumalsamy M (2016) Kinetic studies on oil extraction and biodiesel production from underutilized *Annona squamosa* seeds. *Fuel* 180:211-217

Cerri CEP, You X, Cherubin MR, Moreira CS, Raucci GS, Castigioni BA, Alves PA, Cerri DGP, Mello FFC, Cerri CC (2017) Assessing the greenhouse gas emissions of Brazilian soybean biodiesel production. *Plos One* 12:e0176948

Petersson A, Thomsen MH, Hauggaard-Nielsen H, Thomsen A (2007) Potential bioethanol and biogas production using lignocellulosic biomass from winter rye, oilseed rape and faba bean. *Biomass Bioenergy* 31:812-819

Polachini TC, Sato ACK, Cunha RL, Telis-Romero J (2016) Density and rheology of acid suspensions of peanut waste in different conditions: An engineering basis for bioethanol production. *Powder Technol* 294:168-176

Rahman MM, Rasul M, Hassan NMS, Hyde J (2016) Prospects of Biodiesel Production from Macadamia Oil as an Alternative Fuel for Diesel Engines. *Energies* 9:403

Rocha AS, Silva FLH, Conrado LS, Lima FCS, Carvalho JPD, Santos SFM (2014) Ethanol From Cashew Apple Bagasse By Enzymatic Hydrolysis. *Chem Engineer Trans* 37:361-366

Rose DJ, Santra DK (2013) Proso millet (*Panicum miliaceum* L.) fermentation for fuel ethanol production. *Ind Crop Prod* 43:602-605

Russo VM, Webber CL (2012) Peanut pod, seed, and oil yield for biofuel following conventional and organic production systems. *Ind Crop Prod* 39:113-119

Sáez-Bastante J, Fernández-García P, Saavedra M, López-Bellido L, Dorado MP, Pinzi S (2016) Evaluation of *Sinapis alba* as feedstock for biodiesel production in Mediterranean climate. *Fuel* 184:656-664

Saladini F, Vuai SA, Langat BK, Gustavsson M, Bayitse R, Gidamis AB, Belmakki M, Owis AS, Rashamuse K, Sila DN, Bastianoni S (2016) Sustainability assessment of selected biowastes as feedstocks for biofuel and biomaterial production by energy evaluation in five African countries. *Biomass Bioenergy* 85:100-108

Sanjeeva SK, Pinto MP, Narayanan MM, Kini GM, Nair CB, SubbaRao PV, Pullela PK, Ramamoorthy S, Barrow CJ (2014) Distilled technical cashew nut shell liquid (DT-CNSL) as an effective biofuel and additive to stabilize triglyceride biofuels in diesel. *Renew Energy* 71:81-88

Sasmal S, Goud VV, Mohanty K (2012) Ultrasound Assisted Lime Pretreatment of Lignocellulosic Biomass toward Bioethanol Production. *Energy Fuel* 26:3777-3784

Schinas P, Karavalakis G, Davaris C, Anastopoulos G, Karonis D, Zannikos F, Stournas S, Lois E (2009) Pumpkin (*Cucurbita pepo* L.) seed oil as an alternative feedstock for the production of biodiesel in Greece. *Biomass Bioenergy* 33:44-49

Shao X, DiMarco K, Richard TL, Lynd LR (2015) Winter rye as a bioenergy feedstock: impact of crop maturity on composition, biological solubilization and potential revenue. *Biotechnol Biofuels* 8:35

Smuga-Kogut M, Zgórska K, Kogut T, Kukielka K, Wojdalski J, Kupczyk A, Drózd B, Wielewska I (2017) The use of ionic liquid pretreatment of rye straw for bioethanol production. *Fuel* 191:266-274

Sukiran MA, Abnisa F, Daud WMAW, Bakar NA, Loh SK (2017) A review of torrefaction of oil palm solid wastes for biofuel production. *Energ Convers Manage* 149:101-120

Szymanska-Chargot M, Chylinska M, Gdula K, Koziol A, Zdunek A (2017) Isolation and Characterization of Cellulose from Different Fruit and Vegetable Pomaces. *Polym* 9:495

Tenorio C, Moya R, Tomazello Filho M, Valaert J (2015) Quality of Pellets Made from Agricultural and Forestry Crops in Costa Rican Tropical Climates. *Bioresources* 10:482-498

Timko JA, Amsalu A, Acheampong E, Teferi MK (2014) Local Perceptions about the Effects of *Jatropha* (*Jatropha curcas*) and Castor (*Ricinus communis*) Plantations on Households in Ghana and Ethiopia. *Sustainability* 6:7224-7241

Tishler Y, Samach A, Rogachev I, Elbaum R, Levy, AA (2015) Analysis of Wheat Straw Biodiversity for Use as a Feedstock for Biofuel Production. *Bioenerg Res* 8:1831-1839

Tupufia SC, Jeon YJ, Marquis C, Adesina AA, Rogers PL (2013) Enzymatic conversion of coconut oil for biodiesel production. *Fuel Process Technol* 106:721-726

Ucuncu C, Tari C, Demir H, Buyukkileci AO, Ozen B (2013) Dilute-Acid Hydrolysis of Apple, Orange, Apricot and Peach Pomaces as Potential Candidates for Bioethanol Production. *J Biobased Mater Bio* 7:376-389

Unpaprom Y, Saetang N, Tipnee S (2019) Evaluation of mango, longan and lychee trees pruning leaves for the production of biogas via anaerobic fermentation. *Maejo Int J Energ Environ Comm* 1:20-26

Vazirzadeh M, Karbalaeei-Heidari HR, Mohsenzadeh M (2012) Bioethanol production from white onion by yeast in repeated batch. *Iran J Sci Technol A* 36:477-480

Veiga JPS, Valle TL, Feltran JC, Bizzo WA (2016) Characterization and productivity of cassava waste and its use as an energy source. *Renew Energ* 93:691-699

Victor A, Pulidindi IN, Kim TH, Gedanken A (2016) Design of a selective solid acid catalyst for the optimization of glucose production from *Oryza sativa* straw. *Rsc Adv* 6:31-38

Waluyo B, Roosda AA, Istifadah N, Ruswandi D, Karuniawan A (2015) Identification of Fifty Sweetpotato (*Ipomoea batatas* (L.) Lam.) Promising Clones for Bioethanol Raw Materials. *Enrgy Proced* 65:22-28

Wang F, Jiang Y, Guo W, Niu K, Zhang R, Hou S, Wang M, Yi Y, Zhu C, Jia C, Fang X (2016) An environmentally friendly and productive process for bioethanol production from potato waste. *Biotechnol Biofuels* 9:50

White WG, Vincent ML, Moose SP, Below FE (2012) The sugar, biomass and biofuel potential of temperate by tropical maize hybrids. *GCB Bioenergy* 4:496-508

Winayanuwattikun P, Kaewpiboon C, Piriayakananon K, Tantong S, Thakernkarnkit W, Chulalaksananukul W, Yongvanich T (2008) Potential plant oil feedstock for lipase-catalyzed biodiesel production in Thailand. *Biomass Bioenerg* 32:1279-1286

Wu S, Wang D, Bean S, Wilson J (2006) Ethanol Production from Pearl Millet Using *Saccharomyces cerevisiae* 1. *Cereal Chem* 83:127-131

Xia H, Houghton JA, Clark JH, Matharu AS (2016) Potential Utilization of Unavoidable Food Supply Chain Wastes-Valorization of Pea Vine Wastes. *Acs Sustain Chem Eng.* 4:6002-6009

Xu R, Ferrante L, Briens C, Berruti F (2009) Flash pyrolysis of grape residues into biofuel in a bubbling fluid bed. *J Anal Appl Pyrol* 86:58-65

Zbytek Z, Dach J, Pawlowski T, Smurzynska A, Czekala W, Janczak D (2016) Energy and economic potential of maize straw used for biofuels production. *Matec Web Conf* 60:04008

Zhang G, Liu X, Quan Z, Cheng S, Xu X, Pan S, Xie M, Zeng P, Yue Z, Wang W, Tao Y, Bian C, Han C, Xia Q, Peng X, Cao R, Yang X, Zhan D, Hu J, Zhang Y, Li H, Li H, Li N, Wang J, Wang C, Wang R, Guo T, Cai Y, Liu C, Xiang H, Shi Q, Huang P, Chen Q, Li Y, Wang J, Zhao Z, Wang J (2012) Genome sequence of foxtail millet (*Setaria italica*) provides insights into grass evolution and biofuel potential. *Nat Biotechnol* 30:549-554

Ziebell AL, Barb JG, Sandhu S, Moyers BT, Sykes RW, Doepcke C, Gracom KL, Carlile M, Marek LF, Davis MF, Knapp SJ, Burke JM (2013) Sunflower as a biofuels crop: An analysis of lignocellulosic chemical properties. *Biomass Bioenerg* 59:208-217

Supplementary Material: Appendix 3

Total number of sites from the PREDICTS database for each category of biofuel crop in each region and total number of sites that recorded each taxonomic group for each category of biofuel crop.

| Biofuel<br>crop<br>category | Number of sites |      |                               |        |                  |         |               |        |             |
|-----------------------------|-----------------|------|-------------------------------|--------|------------------|---------|---------------|--------|-------------|
|                             | Africa          | Asia | Central<br>& South<br>America | Europe | North<br>America | Oceania | Invertebrates | Plants | Vertebrates |
| Coffee                      | 90              | 16   | 157                           | 0      | 0                | 0       | 105           | 122    | 36          |
| Cotton                      | 35              | 0    | 0                             | 0      | 0                | 0       | 24            | 11     | 0           |
| Fruit/<br>vegetable         | 15              | 92   | 258                           | 73     | 9                | 12      | 141           | 40     | 261         |
| Maize                       | 14              | 2    | 138                           | 0      | 3                | 0       | 89            | 67     | 1           |
| Mixed<br>crops              | 682             | 43   | 272                           | 94     | 71               | 33      | 175           | 338    | 682         |
| Oil palm                    | 0               | 74   | 0                             | 0      | 0                | 0       | 28            | 0      | 46          |
| Other<br>grain              | 1               | 0    | 0                             | 50     | 0                | 0       | 48            | 0      | 3           |
| Other oil<br>crop           | 4               | 6    | 1                             | 4      | 22               | 9       | 29            | 6      | 9           |
| Perennial<br>grass          | 0               | 0    | 3                             | 6      | 5                | 15      | 23            | 6      | 0           |
| Rapeseed<br>oil             | 0               | 1    | 0                             | 79     | 0                | 9       | 89            | 0      | 0           |
| Rubber                      | 0               | 17   | 0                             | 0      | 0                | 0       | 16            | 0      | 1           |
| Soybean                     | 0               | 21   | 70                            | 0      | 0                | 0       | 35            | 56     | 0           |
| Wheat                       | 0               | 14   | 0                             | 90     | 11               | 18      | 120           | 11     | 0           |



Supplementary Material: Appendix 4

Results from the model with species richness as the response variable and land-use, including biofuel crop category (LandUseCat), as the explanatory variable, with R<sup>2</sup> values and results table. SS = Source – Study, SSB = Source – Study – Block, SSBS = Source – Study - Block – Site.

Marginal R<sup>2</sup> = 0.0067 (2 sf) and conditional R<sup>2</sup> = 0.90 (2 sf). Significance of between 0 and 0.001 = \*\*\*, between 0.001 and 0.01= \*\*, between 0.01 and 0.05 = \*, between 0.05 and 0.1 = . and between 0.1 and 1 = blank space.

| Model parameter                |          |            |         |          |              |
|--------------------------------|----------|------------|---------|----------|--------------|
| Random effects                 | Variance | SD         |         |          |              |
| SSBS                           | 0.07415  | 0.2723     |         |          |              |
| SSB                            | 0.03362  | 0.1834     |         |          |              |
| SS                             | 1.39274  | 1.1801     |         |          |              |
| Fixed effects                  | Estimate | Std. Error | z value | Pr(> z ) | Significance |
| (Intercept)                    | 2.52862  | 0.04490    | 56.32   | < 2e-16  | ***          |
| LandUseCatCoffee               | -0.23339 | 0.03579    | -6.52   | 6.96e-11 | ***          |
| LandUseCatCotton               | -0.67113 | 0.10180    | -6.59   | 4.33e-11 | ***          |
| LandUseCatFruit/vegetable      | -0.11646 | 0.03768    | -3.09   | 0.00200  | **           |
| LandUseCatMaize                | -0.44717 | 0.04435    | -10.08  | < 2e-16  | ***          |
| LandUseCatMixed crops          | -0.29459 | 0.02135    | -13.80  | < 2e-16  | ***          |
| LandUseCatOil palm             | -0.36700 | 0.06060    | -6.06   | 1.39e-09 | ***          |
| LandUseCatOther grain          | -0.17718 | 0.09641    | -1.84   | 0.06610  | .            |
| LandUseCatOther oil crop       | -0.27909 | 0.09623    | -2.90   | 0.00373  | **           |
| LandUseCatPasture              | -0.16926 | 0.01222    | -13.85  | < 2e-16  | ***          |
| LandUseCatPerennial grass      | -0.31261 | 0.10026    | -3.12   | 0.00182  | **           |
| LandUseCatRapeseed oil         | -0.19537 | 0.07611    | -2.57   | 0.01026  | *            |
| LandUseCatRubber               | -0.04582 | 0.10552    | -0.43   | 0.66411  |              |
| LandUseCatSecondary vegetation | -0.12534 | 0.01032    | -12.14  | < 2e-16  | ***          |
| LandUseCatSoybean              | -0.60632 | 0.06639    | -9.13   | < 2e-16  | ***          |

---

|                 |          |         |        |          |     |
|-----------------|----------|---------|--------|----------|-----|
| LandUseCatUrban | -0.25847 | 0.02368 | -10.92 | < 2e-16  | *** |
| LandUseCatWheat | -0.45508 | 0.06016 | -7.56  | 3.89e-14 | *** |

---

Supplementary Material: Appendix 5

Results from the model with total abundance as the response variable and land-use, including biofuel crop category (LandUseCat), as the explanatory variable, with  $R^2$  values and results table. SS = Source – Study, SSB = Source – Study – Block, SSBS = Source – Study - Block – Site.

Marginal  $R^2 = 0.0033$  (2 sf) and conditional  $R^2 = 0.90$  (2 sf).

| Model parameter                |          |            |         |
|--------------------------------|----------|------------|---------|
| Random effects                 | Variance | SD         |         |
| SSB                            | 0.2240   | 0.4733     |         |
| SS                             | 5.1455   | 2.2684     |         |
| Residual                       | 0.6196   | 0.7871     |         |
| Fixed effects                  | Estimate | Std. Error | t value |
| (Intercept)                    | 4.71044  | 0.09249    | 50.93   |
| LandUseCatCoffee               | -0.32848 | 0.09917    | -3.31   |
| LandUseCatCotton               | -1.99779 | 0.19839    | -10.07  |
| LandUseCatFruit/vegetable      | -0.08473 | 0.07772    | -1.09   |
| LandUseCatMaize                | -0.55408 | 0.10609    | -5.22   |
| LandUseCatMixed crops          | -0.14496 | 0.03764    | -3.85   |
| LandUseCatOil palm             | -1.01357 | 0.14475    | -7.00   |
| LandUseCatOther grain          | -0.45214 | 0.14508    | -3.12   |
| LandUseCatOther oil crop       | 0.20000  | 0.25439    | 0.79    |
| LandUseCatPasture              | -0.21506 | 0.02556    | -8.42   |
| LandUseCatPerennial grass      | 0.46546  | 0.21685    | 2.15    |
| LandUseCatRapeseed oil         | 0.46843  | 0.15138    | 3.09    |
| LandUseCatRubber               | -0.36355 | 0.27226    | -1.34   |
| LandUseCatSecondary vegetation | -0.17520 | 0.02219    | -7.90   |
| LandUseCatSoybean              | -1.25428 | 0.26514    | -4.73   |
| LandUseCatUrban                | -0.18306 | 0.04512    | -4.06   |

---

|                 |          |         |       |
|-----------------|----------|---------|-------|
| LandUseCatWheat | -0.58893 | 0.10293 | -5.72 |
|-----------------|----------|---------|-------|

---

Supplementary Material: Appendix 6

Results from the model with total abundance as the response variable and land-use, including biofuel crop generation (LandUseGen), as the explanatory variable, with  $R^2$  values and results table. SS = Source – Study, SSB = Source – Study – Block, SSBS = Source – Study - Block – Site.

Marginal  $R^2 = 0.0018$  (2 sf) and conditional  $R^2 = 0.90$  (2 sf).

| Model parameter                |          |            |         |
|--------------------------------|----------|------------|---------|
| Random effects                 | Variance | SD         |         |
| SSB                            | 0.2261   | 0.4754     |         |
| SS                             | 5.1661   | 2.2729     |         |
| Residual                       | 0.6225   | 0.7890     |         |
| Fixed effects                  | Estimate | Std. Error | t value |
| (Intercept)                    | 4.70825  | 0.09305    | 50.60   |
| LandUseGen1st generation       | -0.49234 | 0.06888    | -7.15   |
| LandUseGen2nd generation       | -0.28983 | 0.05577    | -5.20   |
| LandUseGenPasture              | -0.19653 | 0.02651    | -7.41   |
| LandUseGenSecondary vegetation | -0.17679 | 0.02240    | -7.89   |
| LandUseGenUrban                | -0.18768 | 0.04547    | -4.13   |

Supplementary Material: Appendix 7

Results from the model with species richness as the response variable and land-use, including biofuel crop generation (LandUseGen), as the explanatory variable, with R<sup>2</sup> values and results table. SS = Source – Study, SSB = Source – Study – Block, SSBS = Source – Study - Block – Site.

Marginal R<sup>2</sup> = 0.0052 (2 sf) and conditional R<sup>2</sup> = 0.90 (2 sf). Significance of between 0 and 0.001 = \*\*\*, between 0.001 and 0.0 = \*\*, between 0.01 and 0.05 = \*, between 0.05 and 0.1 = . and between 0.1 and 1 = blank space.

| Model parameter          |          |            |         |          |              |
|--------------------------|----------|------------|---------|----------|--------------|
| Random effects           | Variance | SD         |         |          |              |
| SSBS                     | 0.07297  | 0.2701     |         |          |              |
| SSB                      | 0.03276  | 0.1810     |         |          |              |
| SS                       | 1.40080  | 1.1836     |         |          |              |
| Fixed effects            | Estimate | Std. Error | z value | Pr(> z ) | Significance |
| (Intercept)              | 2.52001  | 0.04517    | 55.79   | <2e-16   | ***          |
| LandUseGen1st generation | -0.45281 | 0.02854    | -15.87  | <2e-16   | ***          |
| LandUseGen2nd generation | -0.20599 | 0.02347    | -8.78   | <2e-16   | ***          |
| LandUseGenPasture        | -0.13778 | 0.01247    | -11.05  | <2e-16   | ***          |
| LandUseGenSecondary      | -0.11958 | 0.01028    | -11.63  | <2e-16   | ***          |
| vegetation               |          |            |         |          |              |
| LandUseGenUrban          | -0.25190 | 0.02362    | -10.67  | <2e-16   | ***          |

Supplementary Material: Appendix 8

Results from the model with species richness as the response variable and land-use, including biofuel crop generation (LandUseGen), geographic region and their interaction as the explanatory variables, including  $R^2$  values and results table.

Marginal  $R^2 = 0.022$  (2 sf) and conditional  $R^2 = 0.90$  (2 sf). Significance of between 0 and 0.001 = \*\*\*, between 0.001 and 0.0 = \*\*, between 0.01 and 0.05 = \*, between 0.05 and 0.1 = . and between 0.1 and 1 = blank space.

| Model parameter                |           |            |         |          |              |
|--------------------------------|-----------|------------|---------|----------|--------------|
| Random effects                 | Variance  | SD         |         |          |              |
| SSBS                           | 0.07233   | 0.2689     |         |          |              |
| SSB                            | 0.03019   | 0.1738     |         |          |              |
| SS                             | 1.37324   | 1.1719     |         |          |              |
| Fixed effects                  | Estimate  | Std. Error | z value | Pr(> z ) | Significance |
| (Intercept)                    | 2.390040  | 0.122233   | 19.553  | < 2e-16  | ***          |
| LandUseGen1st generation       | -0.444477 | 0.111503   | -3.986  | 6.71e-05 | ***          |
| LandUseGen2nd generation       | -0.276141 | 0.044443   | -6.213  | 5.19e-10 | ***          |
| LandUseGenPasture              | -0.284353 | 0.055972   | -5.080  | 3.77e-07 | ***          |
| LandUseGenSecondary vegetation | -0.107792 | 0.026971   | -3.997  | 6.42e-05 | ***          |
| LandUseGenUrban                | -0.082235 | 0.081120   | -1.014  | 0.310702 |              |
| RegionAsia                     | 0.402709  | 0.162717   | 2.475   | 0.013327 | *            |

|                                                              |           |          |        |          |     |
|--------------------------------------------------------------|-----------|----------|--------|----------|-----|
| RegionCentral & South America                                | 0.195139  | 0.149438 | 1.306  | 0.191616 |     |
| RegionEurope                                                 | 0.047874  | 0.151953 | 0.315  | 0.752718 |     |
| RegionNorth America                                          | -0.123192 | 0.196178 | -0.628 | 0.530029 |     |
| RegionOceania                                                | 0.113362  | 0.194125 | 0.584  | 0.559245 |     |
| LandUseGen1st generation:RegionAsia                          | -0.063970 | 0.122759 | -0.521 | 0.602293 |     |
| LandUseGen2nd generation:RegionAsia                          | 0.127612  | 0.064390 | 1.982  | 0.047496 | *   |
| LandUseGenPasture:RegionAsia                                 | 0.069120  | 0.147680 | 0.468  | 0.639755 |     |
| LandUseGenSecondary vegetation:RegionAsia                    | -0.098217 | 0.035725 | -2.749 | 0.005973 | **  |
| LandUseGenUrban:RegionAsia                                   | -0.673426 | 0.133107 | -5.059 | 4.21e-07 | *** |
| LandUseGen1st generation:RegionCentral & South America       | -0.027187 | 0.125005 | -0.217 | 0.827829 |     |
| LandUseGen2nd generation:RegionCentral & South America       | 0.051698  | 0.061567 | 0.840  | 0.401078 |     |
| LandUseGenPasture:RegionCentral & South America              | 0.163596  | 0.060684 | 2.696  | 0.007021 | **  |
| LandUseGenSecondary vegetation:RegionCentral & South America | 0.162352  | 0.034389 | 4.721  | 2.35e-06 | *** |
| LandUseGenUrban:RegionCentral & South America                | -0.416793 | 0.166678 | -2.501 | 0.012399 | *   |
| LandUseGen1st generation:RegionEurope                        | 0.075298  | 0.124818 | 0.603  | 0.546334 |     |
| LandUseGen2nd generation:RegionEurope                        | 0.230661  | 0.083655 | 2.757  | 0.005828 | **  |
| LandUseGenPasture:RegionEurope                               | 0.157195  | 0.061616 | 2.551  | 0.010735 | *   |
| LandUseGenSecondary vegetation:RegionEurope                  | -0.128369 | 0.036306 | -3.536 | 0.000407 | *** |



|                                                    |           |          |        |          |   |
|----------------------------------------------------|-----------|----------|--------|----------|---|
| LandUseGenUrban:RegionEurope                       | -0.223665 | 0.088725 | -2.521 | 0.011706 | * |
| LandUseGen1st generation:RegionNorth America       | 0.048959  | 0.278482 | 0.176  | 0.860447 |   |
| LandUseGen2nd generation:RegionNorth America       | 0.006152  | 0.192933 | 0.032  | 0.974562 |   |
| LandUseGenPasture:RegionNorth America              | -0.075363 | 0.086385 | -0.872 | 0.382982 |   |
| LandUseGenSecondary vegetation:RegionNorth America | 0.102169  | 0.043984 | 2.323  | 0.020185 | * |
| LandUseGenUrban:RegionNorth America                | -0.101399 | 0.093512 | -1.084 | 0.278215 |   |
| LandUseGen1st generation:RegionOceania             | 0.071064  | 0.154608 | 0.460  | 0.645774 |   |
| LandUseGen2nd generation:RegionOceania             | 0.068285  | 0.136288 | 0.501  | 0.616348 |   |
| LandUseGenPasture:RegionOceania                    | 0.099361  | 0.061165 | 1.624  | 0.104277 |   |
| LandUseGenSecondary vegetation:RegionOceania       | -0.002824 | 0.043552 | -0.065 | 0.948307 |   |
| LandUseGenUrban:RegionOceania                      | 0.045525  | 0.161379 | 0.282  | 0.777866 |   |

Supplementary Material: Appendix 9

Results from the model with total abundance as the response variable and land-use, including biofuel crop generation (LandUseGen), geographic region and their interaction as the explanatory variables, including R<sup>2</sup> values and results table.

Marginal R<sup>2</sup> = 0.022 (2 sf) and conditional R<sup>2</sup> = 0.90 (2 sf).

| Model parameter                           |          |            |         |
|-------------------------------------------|----------|------------|---------|
| Random effects                            | Variance | SD         |         |
| SSB                                       | 0.2154   | 0.4641     |         |
| SS                                        | 5.1612   | 2.2718     |         |
| Residual                                  | 0.6131   | 0.7830     |         |
| Fixed effects                             | Estimate | Std. Error | t value |
| (Intercept)                               | 4.14540  | 0.26010    | 15.938  |
| LandUseGen1st generation                  | -0.44274 | 0.30092    | -1.471  |
| LandUseGen2nd generation                  | -0.90400 | 0.15224    | -5.938  |
| LandUseGenPasture                         | -0.39018 | 0.08931    | -4.369  |
| LandUseGenSecondary vegetation            | -0.10541 | 0.05674    | -1.858  |
| LandUseGenUrban                           | 0.65901  | 0.12814    | 5.143   |
| RegionAsia                                | 0.64724  | 0.34881    | 1.856   |
| RegionCentral & South America             | 0.55443  | 0.31337    | 1.769   |
| RegionEurope                              | 0.93837  | 0.32114    | 2.922   |
| RegionNorth America                       | 0.09253  | 0.41082    | 0.225   |
| RegionOceania                             | 1.26998  | 0.39832    | 3.188   |
| LandUseGen1st generation:RegionAsia       | -0.62938 | 0.32615    | -1.930  |
| LandUseGen2nd generation:RegionAsia       | 0.46405  | 0.19940    | 2.327   |
| LandUseGenPasture:RegionAsia              | 0.08827  | 0.36299    | 0.243   |
| LandUseGenSecondary vegetation:RegionAsia | -0.10407 | 0.08374    | -1.243  |
| LandUseGenUrban:RegionAsia                | -1.71004 | 0.27131    | -6.303  |

|                                                              |          |         |        |
|--------------------------------------------------------------|----------|---------|--------|
| LandUseGen1st generation:RegionCentral & South America       | -0.67156 | 0.37873 | -1.773 |
| LandUseGen2nd generation:RegionCentral & South America       | 0.60569  | 0.17723 | 3.417  |
| LandUseGenPasture:RegionCentral & South America              | 0.34997  | 0.10020 | 3.493  |
| LandUseGenSecondary vegetation:RegionCentral & South America | 0.21553  | 0.07110 | 3.031  |
| LandUseGenUrban:RegionCentral & South America                | -1.49846 | 0.26502 | -5.654 |
| LandUseGen1st generation:RegionEurope                        | -0.14400 | 0.32161 | -0.448 |
| LandUseGen2nd generation:RegionEurope                        | 0.53359  | 0.19448 | 2.744  |
| LandUseGenPasture:RegionEurope                               | -0.07174 | 0.10443 | -0.687 |
| LandUseGenSecondary vegetation:RegionEurope                  | -0.56198 | 0.07691 | -7.307 |
| LandUseGenUrban:RegionEurope                                 | -1.28504 | 0.14921 | -8.612 |
| LandUseGen1st generation:RegionNorth America                 | 0.30402  | 0.61347 | 0.496  |
| LandUseGen2nd generation:RegionNorth America                 | 2.12108  | 0.38889 | 5.454  |
| LandUseGenPasture:RegionNorth America                        | -0.10123 | 0.14481 | -0.699 |
| LandUseGenSecondary vegetation:RegionNorth America           | 0.31089  | 0.08956 | 3.471  |
| LandUseGenUrban:RegionNorth America                          | -0.74287 | 0.15427 | -4.816 |
| LandUseGen1st generation:RegionOceania                       | 0.37073  | 0.35965 | 1.031  |
| LandUseGen2nd generation:RegionOceania                       | 1.07214  | 0.28005 | 3.828  |
| LandUseGenPasture:RegionOceania                              | -0.01691 | 0.11180 | -0.151 |
| LandUseGenSecondary vegetation:RegionOceania                 | -0.13357 | 0.09171 | -1.456 |
| LandUseGenUrban:RegionOceania                                | -0.95576 | 0.25668 | -3.724 |

Supplementary Material: Appendix 10

Results from the model with species richness as the response variable and land-use, including biofuel crop generation (LandUseGen), taxon and their interaction as the explanatory variables, including R<sup>2</sup> values and results table.

Marginal R<sup>2</sup> = 0.050 (2 sf) and conditional R<sup>2</sup> = 0.91 (2 sf). Significance of between 0 and 0.001 = \*\*\*, between 0.001 and 0.0 = \*\*, between 0.01 and 0.05 = \*, between 0.05 and 0.1 = . and between 0.1 and 1 = blank space.

| Model parameter                            |          |            |         |          |              |
|--------------------------------------------|----------|------------|---------|----------|--------------|
| Random effects                             | Variance | SD         |         |          |              |
| SSBS                                       | 0.06778  | 0.2604     |         |          |              |
| SSB                                        | 0.03364  | 0.1834     |         |          |              |
| SS                                         | 1.33408  | 1.1550     |         |          |              |
| Fixed effects                              | Estimate | Std. Error | z value | Pr(> z ) | Significance |
| (Intercept)                                | 2.55312  | 0.06127    | 41.67   | < 2e-16  | ***          |
| LandUseGen1st generation                   | -0.37451 | 0.03973    | -9.43   | < 2e-16  | ***          |
| LandUseGen2nd generation                   | -0.19710 | 0.04093    | -4.82   | 1.47e-06 | ***          |
| LandUseGenPasture                          | -0.14665 | 0.01894    | -7.74   | 9.70e-15 | ***          |
| LandUseGenSecondary vegetation             | -0.08747 | 0.01653    | -5.29   | 1.22e-07 | ***          |
| LandUseGenUrban                            | -0.17225 | 0.03147    | -5.47   | 4.40e-08 | ***          |
| TaxonPlants                                | 0.37441  | 0.12186    | 3.07    | 0.002123 | **           |
| TaxonVertebrates                           | -0.35547 | 0.10283    | -3.46   | 0.000547 | ***          |
| LandUseGen1st generation:TaxonPlants       | -0.30122 | 0.06363    | -4.73   | 2.20e-06 | ***          |
| LandUseGen2nd generation:TaxonPlants       | -0.12026 | 0.05586    | -2.15   | 0.031322 | *            |
| LandUseGenPasture:TaxonPlants              | 0.12277  | 0.02781    | 4.41    | 1.01e-05 | ***          |
| LandUseGenSecondary vegetation:TaxonPlants | -0.13365 | 0.02443    | -5.47   | 4.47e-08 | ***          |
| LandUseGenUrban:TaxonPlants                | -0.13112 | 0.06294    | -2.08   | 0.037227 | *            |

---

|                                    |          |         |       |          |     |
|------------------------------------|----------|---------|-------|----------|-----|
| LandUseGen1st                      | 0.03905  | 0.08070 | 0.48  | 0.628425 |     |
| generation:TaxonVertebrates        |          |         |       |          |     |
| LandUseGen2nd                      | 0.02807  | 0.06088 | 0.46  | 0.644774 |     |
| generation:TaxonVertebrates        |          |         |       |          |     |
| LandUseGenPasture:TaxonVertebrates | -0.20913 | 0.03626 | -5.77 | 8.06e-09 | *** |
| LandUseGenSecondary                | -0.01520 | 0.02593 | -0.59 | 0.557703 |     |
| vegetation:TaxonVertebrates        |          |         |       |          |     |
| LandUseGenUrban:TaxonVertebrates   | 0.04899  | 0.06907 | 0.71  | 0.478175 |     |

---

Supplementary Material: Appendix 11

Results from the model with total abundance as the response variable and land-use, including biofuel crop generation (LandUseGen), taxon and their interaction as the explanatory variables, including R<sup>2</sup> values and results table.

Marginal R<sup>2</sup> = 0.066 (2 sf) and conditional R<sup>2</sup> = 0.90 (2 sf).

| Model parameter                            |          |            |         |
|--------------------------------------------|----------|------------|---------|
| Random effects                             | Variance | SD         |         |
| SSB                                        | 0.2285   | 0.4780     |         |
| SS                                         | 4.8461   | 2.2014     |         |
| Residual                                   | 0.6120   | 0.7823     |         |
| Fixed effects                              | Estimate | Std. Error | t value |
| (Intercept)                                | 5.03754  | 0.12236    | 41.17   |
| LandUseGen1st generation                   | -0.36756 | 0.07929    | -4.64   |
| LandUseGen2nd generation                   | -0.27573 | 0.08167    | -3.38   |
| LandUseGenPasture                          | -0.03758 | 0.03819    | -0.98   |
| LandUseGenSecondary vegetation             | -0.09210 | 0.03395    | -2.71   |
| LandUseGenUrban                            | -0.09720 | 0.05646    | -1.72   |
| TaxonPlants                                | 0.15314  | 0.26414    | 0.58    |
| TaxonVertebrates                           | -1.32267 | 0.20717    | -6.38   |
| LandUseGen1st generation:TaxonPlants       | 0.02696  | 0.24243    | 0.11    |
| LandUseGen2nd generation:TaxonPlants       | -0.33127 | 0.15823    | -2.09   |
| LandUseGenPasture:TaxonPlants              | -0.18037 | 0.06492    | -2.78   |
| LandUseGenSecondary vegetation:TaxonPlants | -0.39992 | 0.05675    | -7.05   |
| LandUseGenUrban:TaxonPlants                | -0.26827 | 0.14549    | -1.84   |
| LandUseGen1st generation:TaxonVertebrates  | -0.77699 | 0.20997    | -3.70   |
| LandUseGen2nd generation:TaxonVertebrates  | 0.04455  | 0.12921    | 0.34    |
| LandUseGenPasture:TaxonVertebrates         | -0.48654 | 0.06721    | -7.24   |

---

|                                  |         |         |      |
|----------------------------------|---------|---------|------|
| LandUseGenSecondary              | 0.00707 | 0.05351 | 0.13 |
| vegetation:TaxonVertebrates      |         |         |      |
| LandUseGenUrban:TaxonVertebrates | 0.45410 | 0.13006 | 3.49 |

---
